# Supplementary material
Source: HighWire-hosted journal article supplement (https://rapm.bmj.com/content/45/5/331)
Supplement: inline-supplementary-material-1 [file inline-supplementary-material-1.pdf]

## Long-term incidence of chronic postsurgical pain after thoracic surgery for lung cancer: A 10-year single-center retrospective study

Susie Yoon, MD<sup>1,2</sup>, Won-Pyo Hong, MD<sup>1</sup>, Hyundeok Joo<sup>3</sup>, Hansol Kim<sup>1</sup>, Samina Park, MD<sup>4,5</sup>, Jae-Hyon Bahk MD, PhD<sup>1,2</sup>, and Ho-Jin Lee, MD<sup>1,2</sup>

<sup>1</sup> Department of Anesthesiology and Pain Medicine, Seoul National University Hospital, Seoul, Republic of Korea

<sup>2</sup> Department of Anesthesiology and Pain Medicine, Seoul National University College of Medicine, Seoul, Republic of Korea

<sup>3</sup> Medical student, Seoul National University College of Medicine, Seoul, Republic of Korea

<sup>4</sup> Department of Thoracic and Cardiovascular Surgery, Seoul National University Hospital, Seoul, Republic of Korea

<sup>5</sup> Department of Thoracic and Cardiovascular Surgery, Seoul National University College of Medicine, Seoul, Republic of Korea

| Number                        | Title                                                                                                                                                       | Page |
|-------------------------------|-------------------------------------------------------------------------------------------------------------------------------------------------------------|------|
| <b>Supplemental Table S1.</b> | <b>Supplemental Table S1.</b> Patient characteristics and perioperative parameters between patients included and excluded in the study due to missing data. | 3,4  |
| <b>Supplemental Table S2.</b> | The trend for the incidence of chronic postsurgical pain (CPSP) during the first 36 months after thoracic surgery.                                          | 5    |
| <b>Supplemental Table S3.</b> | Patient characteristics and perioperative parameters between patients with chronic postsurgical pain (CPSP) continued from acute                            | 6,7  |

|                              |                                                                                                                                     |     |
|------------------------------|-------------------------------------------------------------------------------------------------------------------------------------|-----|
|                              | postoperative pain (acute-onset CPSP) and with delayed-onset CPSP after the asymptomatic period after surgery (delayed-onset CPSP). |     |
| <b>Supplemental Table S4</b> | Surgical and anesthesia related parameters according to the year of surgery.                                                        | 8,9 |

**Supplemental Table S1.** Patient characteristics and perioperative parameters between patients included and excluded in the study due to missing data.

|                                    | Patients included<br>in the study   | Patients excluded<br>in the study <sup>a</sup> | P-value <sup>b,c</sup> |
|------------------------------------|-------------------------------------|------------------------------------------------|------------------------|
| Sample size, n                     | 3200                                | 827                                            |                        |
| Demographic characteristics        |                                     |                                                |                        |
| Age, years                         | 64 (56–71)                          | 65 (56–72)                                     | 0.38                   |
| Sex, n                             |                                     |                                                | 0.02                   |
| Male                               | 1798 (56.2)                         | 502 (60.7)                                     |                        |
| Female                             | 1402 (43.8)                         | 325 (39.3)                                     |                        |
| Body-mass index, kg/m <sup>2</sup> | 23.6 (21.6–25.6)                    | 23.1 (21.0–25.2)                               | <0.001                 |
| Current smoker, n                  | 912 (28.5)                          | 226 (27.3)                                     | 0.53                   |
| Background medical status, n       |                                     |                                                |                        |
| ASA class I/II/III                 | 912 (28.5)/2113<br>(66.0)/175 (5.5) | 241 (29.1)/525<br>(63.5)/61 (7.4)              | 0.09                   |
| Diabetes mellitus                  | 457 (14.3)                          | 141 (17.0)                                     | 0.05                   |
| History of tuberculosis            | 247 (7.7)                           | 71 (8.6)                                       | 0.45                   |
| Chronic analgesic use              | 134 (4.2)                           | 52 (6.3)                                       | 0.01                   |
| Chronic opioid use                 | 6 (0.2)                             | 10 (1.2)                                       | <0.001                 |
| Antipsychotics use                 | 57 (1.8)                            | 11 (1.3)                                       | 0.81                   |
| Preoperative chemotherapy          | 103 (3.2)                           | 55 (6.7)                                       | <0.001                 |
| Postoperative chemotherapy         | 863 (27.0)                          | 274 (33.1)                                     | <0.01                  |
| Preoperative radiation therapy     | 72 (2.2)                            | 36 (4.4)                                       | <0.01                  |
| Postoperative radiation therapy    | 361 (11.3)                          | 101 (12.2)                                     | 0.49                   |
| Previous other surgeries           | 2036 (63.6)                         | 511 (61.8)                                     | 0.35                   |
| Surgical characteristics           |                                     |                                                |                        |

|                                                       |                                             |                                     |        |
|-------------------------------------------------------|---------------------------------------------|-------------------------------------|--------|
| Operation year, n                                     |                                             |                                     | <0.001 |
| 2007/2008/2009/2010/2011/<br>2012/2013/2014/2015/2016 | 167/152/165/185/339/<br>397/385/442/469/499 | 77/85/95/79/65/<br>84/78/38/106/120 |        |
| Operative technique, n                                |                                             |                                     | <0.001 |
| Thoracotomy                                           | 804 (25.1)                                  | 328 (39.7)                          |        |
| VATS                                                  | 2396 (74.9)                                 | 499 (60.3)                          |        |
| Operation type, n                                     |                                             |                                     | <0.001 |
| Pneumonectomy                                         | 70 (2.2)                                    | 33 (4.0)                            |        |
| Lobectomy                                             | 2588 (80.9)                                 | 552 (66.7)                          |        |
| Segmentectomy                                         | 241 (7.5)                                   | 31 (3.7)                            |        |
| Wedge resection                                       | 283 (8.8)                                   | 158 (19.1)                          |        |
| Biopsy                                                | 16 (0.5)                                    | 45 (5.4)                            |        |
| Pleurodesis                                           | 0 (0)                                       | 6 (0.7)                             |        |
| Combined aortic surgery                               | 0 (0)                                       | 2 (0.2)                             |        |
| Explorative surgery                                   | 2 (0.1)                                     | 0 (0)                               |        |
| Operation time, min                                   | 150 (120–195)                               | 145 (100–200)                       | <0.001 |
| Maximal NRS during POD 2, 0-<br>10                    | 7 (5–8)                                     | 7 (5–8)                             | 0.06   |
| All-cause death within 36 months<br>after surgery     | 297 (9.3)                                   | 263 (31.8)                          | <0.001 |

The values are presented as the median (interquartile range) or number (%).

Abbreviations: ASA, American Society of Anesthesiologist physical status classification; VATS, Video-assisted thoracic surgery; NRS, numeric rating scale; POD, postoperative day

a: Patients with history of previous thoracic surgery, those who underwent re-operation at the ipsilateral site during the study period, and treated with surgical methods other than VATS and thoracotomy were not included in this group.

b: P-value compares the patients included in the study and excluded in the study due to missing data.

c: Continuous variables were compared using the Mann-Whitney U test. Proportions were compared using the Chi-squared or Fisher's exact test according to their expected counts.

**Supplemental Table S2.** The trend for the incidence of chronic postsurgical pain during the first 36 months after thoracic surgery.

| Time (months)<br>after surgery | Continued CPSP | Recurrent<br>CPSP | Newly developed<br>CPSP | Non-CPSP    | Loss to follow-up <sup>a</sup> | All-cause death |
|--------------------------------|----------------|-------------------|-------------------------|-------------|--------------------------------|-----------------|
| 3                              | -              | -                 | 459 (14.3)              | 2741 (85.7) | -                              | -               |
| 6                              | 249 (7.8)      | -                 | 3 (0.1)                 | 2756 (86.1) | 192 (6.0)                      | 9 (0.3)         |
| 9                              | 121 (3.8)      | -                 | 32 (1.0)                | 2555 (79.8) | 493 (15.4)                     | 33 (1.0)        |
| 12                             | 87 (2.7)       | 5 (0.2)           | 14 (0.4)                | 2358 (73.7) | 736 (23.0)                     | 56 (1.8)        |
| 15                             | 67 (2.1)       | 7 (0.2)           | 12 (0.4)                | 2145 (67.0) | 969 (30.3)                     | 87 (2.7)        |
| 18                             | 68 (2.1)       | 4 (0.1)           | 11 (0.3)                | 2045 (63.9) | 1072 (33.5)                    | 119 (3.7)       |
| 21                             | 63 (2.0)       | 6 (0.2)           | 8 (0.3)                 | 1927 (60.2) | 1196 (37.4)                    | 146 (4.6)       |
| 24                             | 54 (1.7)       | 4 (0.1)           | 9 (0.3)                 | 1844 (57.6) | 1289 (40.3)                    | 181 (5.7)       |
| 27                             | 44 (1.4)       | 2 (0.1)           | 2 (0.1)                 | 1739 (54.3) | 1413 (44.2)                    | 210 (6.6)       |
| 30                             | 39 (1.2)       | 3 (0.1)           | 5 (0.2)                 | 1659 (51.8) | 1494 (46.7)                    | 238 (7.4)       |
| 33                             | 38 (1.2)       | 3 (0.1)           | 2 (0.1)                 | 1508 (47.1) | 1649 (51.5)                    | 259 (8.1)       |
| 36                             | 35 (1.1)       | 4 (0.1)           | 1 (0.0)                 | 1417 (44.3) | 1743 (54.5)                    | 297 (9.3)       |

The values are presented as the number (%).

Abbreviations: CPSP, chronic postsurgical pain

<sup>a</sup>This value includes all-cause death.

**Supplemental Table S3.** Patient characteristics and perioperative parameters between patients with chronic postsurgical pain (CPSP) continued from acute postoperative pain (acute-onset CPSP) and with delayed-onset CPSP after the asymptomatic period after surgery (delayed-onset CPSP).

|                                    | Acute-onset CPSP                  | Delayed-onset CPSP             | P-value <sup>a,b</sup> |
|------------------------------------|-----------------------------------|--------------------------------|------------------------|
| Sample size, n                     | 459                               | 99                             |                        |
| Demographic characteristics        |                                   |                                |                        |
| Age, years                         | 64 (58–70)                        | 65 (58–69)                     | 0.97                   |
| Sex, n                             |                                   |                                | 0.53                   |
| Male                               | 246 (53.6)                        | 49 (49.5)                      |                        |
| Female                             | 213 (46.4)                        | 50 (50.5)                      |                        |
| Body-mass index, kg/m <sup>2</sup> | 23.6 (21.9–25.8)                  | 24.1 (21.9–25.9)               | 0.69                   |
| Current smoker, n                  | 124 (27.0)                        | 27 (27.3)                      | >0.99                  |
| Background medical status, n       |                                   |                                |                        |
| ASA class I/II/III                 | 128 (27.9)/303<br>(66.0)/28 (6.1) | 32 (32.3)/61 (61.6)/6<br>(6.1) | 0.67                   |
| Diabetes mellitus                  | 65 (14.2)                         | 17 (17.2)                      | 0.54                   |
| History of tuberculosis            | 45 (8.1)                          | 202 (7.6)                      | 0.80                   |
| Chronic analgesic use              | 21 (4.6)                          | 3 (3.0)                        | 0.78                   |
| Preoperative chemotherapy          | 14 (3.1)                          | 5 (5.1)                        | 0.36                   |
| Postoperative chemotherapy         | 155 (33.8)                        | 41 (41.4)                      | 0.18                   |
| Preoperative radiation therapy     | 10 (2.2)                          | 2 (2.0)                        | >0.99                  |
| Postoperative radiation therapy    | 65 (14.2)                         | 20 (20.2)                      | 0.17                   |
| Previous other surgeries           | 294 (64.1)                        | 64 (64.6)                      | >0.99                  |
| Surgical characteristics           |                                   |                                |                        |
| Operative technique, n             |                                   |                                | 0.32                   |
| Thoracotomy                        | 154 (33.6)                        | 39 (39.4)                      |                        |
| VATS                               | 305 (66.4)                        | 60 (60.6)                      |                        |

|                                                   |               |               |        |
|---------------------------------------------------|---------------|---------------|--------|
| Operation type, n                                 |               |               | 0.28   |
| Pneumonectomy                                     | 15 (3.3)      | 1 (1.0)       |        |
| Lobectomy                                         | 379 (82.6)    | 92 (92.9)     |        |
| Segmentectomy                                     | 26 (5.7)      | 2 (2.0)       |        |
| Wedge resection                                   | 35 (7.6)      | 4 (4.0)       |        |
| Biopsy                                            | 3 (0.7)       | 0 (0)         |        |
| Explorative surgery                               | 1 (0.2)       | 0 (0)         |        |
| Operation time, min                               | 160 (130–215) | 175 (135–223) | 0.40   |
| Type of anesthesia, n                             |               |               | <0.01  |
| Inhalation agent                                  | 141 (30.7)    | 46 (46.5)     |        |
| TIVA                                              | 318 (69.3)    | 53 (53.5)     |        |
| Intraoperative bupivacaine use, n                 | 123 (26.8)    | 20 (20.2)     | 0.22   |
| Type of PCA, n                                    |               |               | 0.78   |
| Intravenous PCA                                   | 352 (76.7)    | 74 (74.7)     |        |
| Epidural PCA                                      | 104 (22.7)    | 25 (25.3)     |        |
| Paravertebral PCA                                 | 3 (0.7)       | 0 (0)         |        |
| Maximal NRS during POD 2, 0-10                    | 7 (5–8)       | 7 (6–8)       | 0.41   |
| NRS at first outpatient visit after surgery, 0-10 | 4 (3–5)       | 3 (2–5)       | <0.001 |

The values are presented as the median (interquartile range) or number (%).

Abbreviations: CPSP, chronic postsurgical pain; ASA, American Society of Anesthesiologist physical status classification; VATS, Video-assisted thoracic surgery; TIVA, total intravenous anesthesia; PCA, patient controlled analgesia; NRS, numeric rating scale; POD, postoperative day

a: P-value compares CPSP group versus non-CPSP group, b: Mann-Whitney U test used to compare medians and chi-square test or Fisher's exact test used to compare proportions

**Supplemental Table S4.** Surgical and anesthesia related parameters according to the year of surgery.

| Variable                                             | 2007 (n=167)  | 2008 (n=152)  | 2009 (n=165)  | 2010 (n=185)  | 2011 (n=339)  |
|------------------------------------------------------|---------------|---------------|---------------|---------------|---------------|
| Female, n                                            | 55 (32.9)     | 76 (50.0)     | 65 (39.4)     | 79 (42.7)     | 164 (48.4)    |
| Age, years                                           | 65 (58–71)    | 62 (55–68)    | 66 (58–71)    | 64 (57–69)    | 63 (56–69)    |
| Thoracotomy (vs. VATS), n                            | 113 (67.7)    | 90 (59.2)     | 76 (46.1)     | 64 (34.6)     | 80 (23.6)     |
| Operation time, min                                  | 185 (145–230) | 170 (140–220) | 170 (135–225) | 179 (145–220) | 155 (125–200) |
| Inhalational anesthesia (vs. TIVA), n                | 167 (100)     | 152 (100)     | 165 (100)     | 185 (100)     | 219 (64.6)    |
| Epidural PCA (vs. Intravenous PCA), n                | 95 (56.9)     | 69 (45.4)     | 78 (47.3)     | 53 (28.6)     | 85 (25.1)     |
| Maximal NRS during POD 2, 0–10                       | 7 (5–8)       | 5 (4–7)       | 6 (5–7)       | 7 (5–8)       | 7 (5–8)       |
| NRS at first outpatient visit after surgery,<br>0–10 | 2 (0–5)       | 2 (0–5)       | 2 (0–4)       | 3 (0–4)       | 3 (1–3)       |
| Postoperative chemotherapy, n                        | 80 (47.9)     | 56 (36.8)     | 50 (30.3)     | 59 (31.9)     | 108 (31.9)    |
| Postoperative radiation therapy, n                   | 28 (16.8)     | 24 (15.8)     | 30 (18.2)     | 27 (14.6)     | 55 (16.2)     |
| Variable                                             | 2012 (n=397)  | 2013 (n=385)  | 2014 (n=442)  | 2015 (n=469)  | 2016 (n=499)  |
| Female, n                                            | 184 (46.3)    | 157 (40.8)    | 184 (41.6)    | 214 (45.6)    | 224 (44.9)    |
| Age, years                                           | 63 (56–70)    | 64 (55–71)    | 64 (57–71)    | 65 (58–72)    | 64 (57–71)    |
| Thoracotomy (vs. VATS), n                            | 63 (15.9)     | 82 (21.3)     | 79 (17.9)     | 73 (15.6)     | 84 (16.8)     |

|                                                      |               |               |               |               |               |
|------------------------------------------------------|---------------|---------------|---------------|---------------|---------------|
| Operation time, min                                  | 140 (115–175) | 153 (125–205) | 156 (130–200) | 136 (110–170) | 130 (109–165) |
| Inhalational anesthesia (vs. TIVA), n                | 5 (1.3)       | 0 (0)         | 41 (9.3)      | 0 (0)         | 1 (0.2)       |
| Epidural PCA (vs. Intravenous PCA), n                | 52 (13.1)     | 74 (19.2)     | 62 (14.0)     | 51 (10.9)     | 61 (12.2)     |
| Maximal NRS during POD 2, 0–10                       | 7 (6–9)       | 7 (5–8)       | 7 (6–8)       | 7 (5–8)       | 6 (5–8)       |
| NRS at first outpatient visit after surgery,<br>0–10 | 3 (1–3)       | 2 (0–3)       | 2 (0–4)       | 2 (0–3)       | 2 (0–3)       |
| Postoperative chemotherapy, n                        | 94 (23.7)     | 104 (27.0)    | 100 (22.6)    | 96 (20.5)     | 116 (23.2)    |
| Postoperative radiation therapy, n                   | 39 (9.8)      | 53 (13.8)     | 45 (10.2)     | 28 (6.0)      | 32 (6.4)      |

---

The values are presented as the median (interquartile range) or number (%)

Abbreviations: VATS, Video-assisted thoracic surgery; TIVA, total intravenous anesthesia; PCA, patient controlled analgesia; NRS, numeric rating scale; POD, postoperative day
